# Supplementary material for: The Diverging Routes of BORIS and CTCF: An Interactomic and Phylogenomic Analysis
Source: PubMed Central journal article supplement (PMC5871936; doi:10.3390/life8010004), 2018-01-30
Supplement: life-08-00004-s001.pdf [file life-08-00004-s001.pdf]

## The diverging routes of BORIS and CTCF: An interactomic and phylogenomic analysis

Kamel Jabbari, Peter Heger, Ranu Sharma and Thomas Wiehe

### Supplementary material

**Table S1:** Results of Blastn of CTCF from Fly catcher (*Ficedula albicollis*) on birds DNA sequences from NCBI.

|                                   | Max<br>score | Total<br>score | Query<br>cover | E value   | Ident | Accession      |
|-----------------------------------|--------------|----------------|----------------|-----------|-------|----------------|
| <i>Ficedula albicollis</i>        | 691          | 691            | 99%            | 0         | 99%   | XM_005057389.1 |
| <i>Pseudopodoces humilis</i>      | 644          | 644            | 100%           | 0         | 93%   | XM_014254020.1 |
| <i>Parus major</i>                | 637          | 637            | 100%           | 0         | 92%   | XM_015647591.1 |
| <i>Corvus cornix</i>              | 630          | 630            | 100%           | 0         | 92%   | XM_010396812.3 |
| <i>Serinus canaria</i>            | 629          | 629            | 99%            | 0         | 92%   | XM_018917407.1 |
| <i>Manacus vitellinus</i>         | 585          | 585            | 100%           | 0         | 84%   | XM_018073983.1 |
| <i>Lepidothrix coronata</i>       | 584          | 584            | 100%           | 0         | 84%   | XM_017815221.1 |
| <i>Pseudopodoces humilis</i>      | 537          | 650            | 98%            | 0         | 93%   | XM_014254022.1 |
| <i>Gavia stellata</i>             | 535          | 636            | 96%            | 0         | 78%   | XM_009809153.1 |
| <i>Haliaeetus albicilla</i>       | 519          | 622            | 97%            | 0         | 76%   | XM_009917251.1 |
| <i>Fulmarus glacialis</i>         | 496          | 496            | 97%            | 3.00E-172 | 72%   | XM_009580776.1 |
| <i>Zonotrichia albicollis</i>     | 479          | 479            | 83%            | 1.00E-168 | 85%   | XM_014268469.1 |
| <i>Melopsittacus undulatus</i>    | 466          | 564            | 95%            | 9.00E-159 | 71%   | XM_013128648.1 |
| <i>Tyto alba</i>                  | 465          | 564            | 98%            | 9.00E-159 | 69%   | XM_009973007.1 |
| <i>Calypte anna</i>               | 462          | 555            | 98%            | 1.00E-157 | 67%   | XM_008497988.1 |
| <i>Phaethon lepturus</i>          | 456          | 561            | 84%            | 4.00E-157 | 76%   | XM_010289200.1 |
| <i>Nestor notabilis</i>           | 456          | 456            | 98%            | 9.00E-156 | 67%   | XM_010010226.1 |
| <i>Taeniopygia guttata</i>        | 447          | 520            | 72%            | 1.00E-155 | 90%   | XM_004177089.1 |
| <i>Lonchura striata domestica</i> | 432          | 487            | 71%            | 8.00E-151 | 91%   | XM_021553588.1 |
| <i>Columba livia</i>              | 444          | 534            | 97%            | 2.00E-141 | 66%   | XM_021283608.1 |
| <i>Lepidothrix coronata</i>       | 450          | 450            | 75%            | 1.00E-140 | 86%   | XR_001874876.1 |
| <i>Aptenodytes forsteri</i>       | 412          | 516            | 71%            | 1.00E-140 | 82%   | XM_019470692.1 |
| <i>Chlamydotis macqueenii</i>     | 405          | 504            | 72%            | 1.00E-138 | 80%   | XM_010129219.1 |
| <i>Opisthocomus hoazin</i>        | 406          | 511            | 71%            | 3.00E-138 | 82%   | XM_009933922.1 |
| <i>Numida meleagris</i>           | 422          | 514            | 97%            | 8.00E-138 | 63%   | XM_021416918.1 |
| <i>Apteryx australis mantelli</i> | 403          | 584            | 72%            | 7.00E-137 | 81%   | XM_013951392.1 |
| <i>Tinamus guttatus</i>           | 405          | 512            | 71%            | 3.00E-136 | 80%   | XM_010227722.1 |

**Table S2:** Summary information on genes present in the syntenic region of mouse.

| Protein | Function                                       | Gene start  | Expression                  |
|---------|------------------------------------------------|-------------|-----------------------------|
| Spo11   | SPO11 meiotic protein covalently bound to DSB  | 172,977,700 | high in male tissues        |
| Rae1    | ribonucleic acid export 1                      | 173,000,117 | high in male tissues        |
| Rbm38   | RNA binding motif protein 38                   | 173,020,498 | widely expressed            |
| Ctcf1   | CCCTC-binding factor                           | 173,093,609 | high in male tissues        |
| Pck1    | phosphoenolpyruvate carboxykinase 1, cytosolic | 173,153,048 | very low                    |
| Zbp1    | Z-DNA binding protein 1                        | 173,206,612 | very low                    |
| Pmepa1  | prostate androgen induced 1                    | 173,224,458 | high in male/female tissues |

### CTCFL locus of *Alligator mississippiensis*

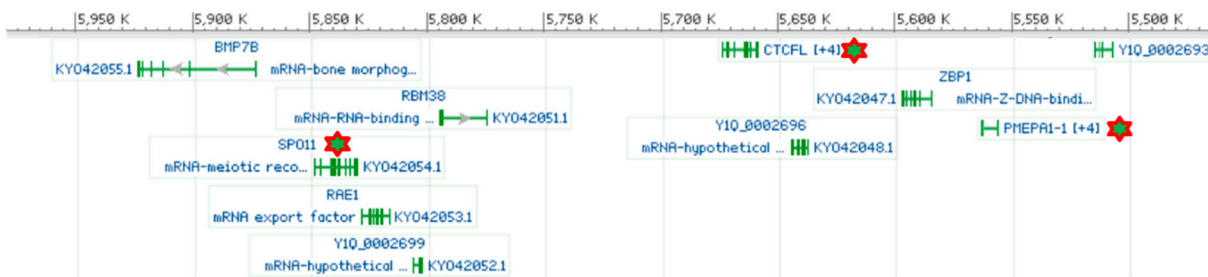

### CTCFL locus of *Crocodylus porosus*

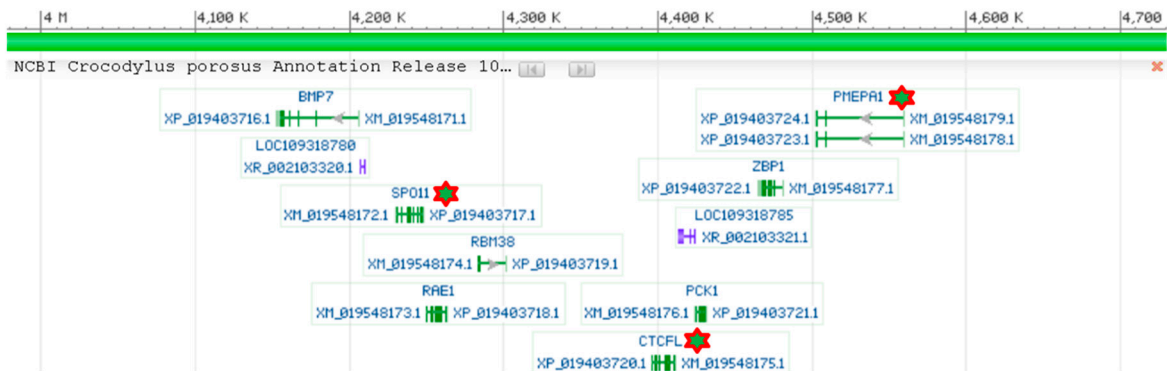

**Figure S1:** Locus Ensembl snapshot of conserved gene order around Spo11 in reptiles. Stars point to the conserved gene order alluded to in the main text (Spo11, CTCFL and PMEPA1).

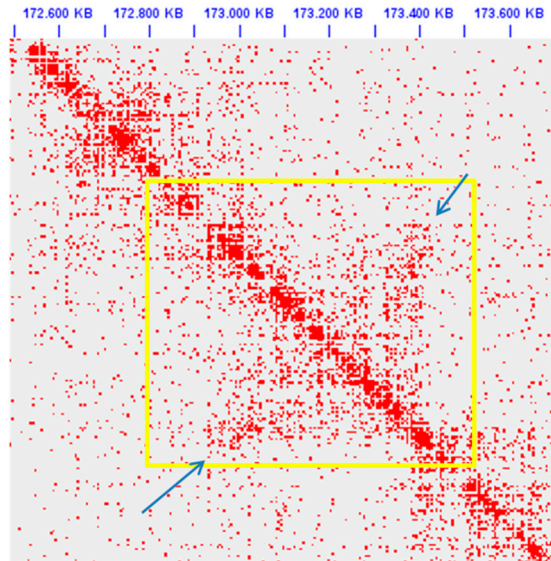

**Figure S2:** Mouse sperm cell Hi-C map from Battulin et al., showing the same loop as in Figure 6, Loop bases are indicated with arrows.

Figure S3

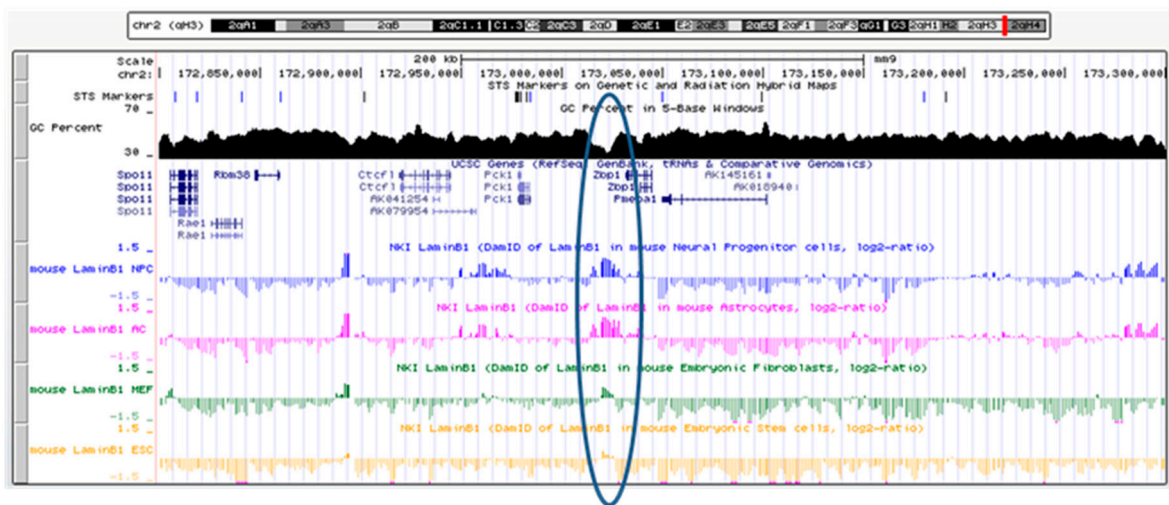

**Figure S3:** Snapshot of the UCSC mouse (mm9) genome browser showing lamin associated domains. Tracks show a high resolution map of the interaction sites of chromosome 2 (chr2:172,800,000-173,300,500) with Lamin B1 (a key Nuclear lamina component); the LADs state in sperm cell are not documented. ESC (embryonic stem cells); NPC (neural progenitor cells); AC (astrocytes); MEF (fibroblasts). The encircled region marks the possible repressive effect of LADs (lamina associated domains) on PCK1 and ZNP1.

## Supplementary Materials

### Section 1

Anolis lizard Gene: FAM131A ENSACAG00000002314

>Scaffold GL343245.1: 60,976-150,142 reverse strand.

PILMMVYSRVVIPTLCVIITLNSLFRATDQKVNVCSEVLEAIENVILDVLKSLAKKKAP  
VLTLANRSDWRNIEFKDSVGLQMIPHSSTKQIRSDCPATAPKFMMLKILSMIYKMOVSN  
SYATKRDIYSDKLLFGSQRVVDNLINEISCMLQIPRRSLHILSTTRGFVAGNLSYTEED  
GTKVNCTCGATAVTVPSNVQGIKNLYSHAKFILIVEKDATFQRLDDEFKICLAPCIMIT  
GRGIPDLNTRLLVRKLWDTLQIPIFTLMDADPHGVEIMCIYKYGSVMSFEAHQLTVPCI  
KWLGLLPSDIKRLNIRKDVLPFTKQDQNKLASLQKRPYIACQPVWKKKELEIMAASKMKA  
EIQVLTSLSSDYLSRVYLPNKLQFCGWI

### Section 2

#### **Uniprot annotation of human orthologs of nematode genes that were occasionally lost in parallel with CTCF.**

**RXRA\_HUMAN:** In the absence of ligand, the RXR-RAR heterodimers associate with a multiprotein complex containing transcription corepressors that induce histone acetylation, chromatin condensation and transcriptional suppression. On ligand binding, the corepressors dissociate from the receptors and associate with the coactivators leading to transcriptional activation. The RXRA/PPARA heterodimer is required for PPARA transcriptional activity on fatty acid oxidation genes such as ACOX1 and the P450 system genes. Plays a role in regulating enhancer activation (PubMed:28575647). Proposed core component of the chromatin remodeling INO80 complex which is involved in transcriptional regulation, DNA replication and probably DNA repair; proposed to target the INO80 complex to YY1-responsive elements.

**SUZ12\_HUMAN:** Polycomb group (PcG) protein. Component of the PRC2/EED-EZH2 complex, which methylates 'Lys-9' (H3K9me) and 'Lys-27' (H3K27me) of histone H3, leading to transcriptional repression of the affected target gene. The PRC2/EED-EZH2 complex may also serve as a recruiting platform for DNA methyltransferases, thereby linking two epigenetic repression systems. Genes repressed by the PRC2/EED-EZH2 complex include HOXC8, HOXA9, MYT1 and CDKN2A

**THB\_HUMAN:** Thyroid hormone receptor beta

**TYY1\_HUMAN:** Multifunctional transcription factor that exhibits positive and negative control on a large number of cellular and viral genes by binding to sites overlapping the transcription start site. Binds to the consensus sequence 5'-CCGCATNTT-3'; some genes have been shown to contain a longer binding motif allowing enhanced binding; the initial CG dinucleotide can be methylated greatly reducing the binding affinity. The effect on transcription regulation is depending upon the context in which it binds and diverse

mechanisms of action include direct activation or repression, indirect activation or repression via cofactor recruitment, or activation or repression by disruption of binding sites or conformational DNA changes. Its activity is regulated by transcription factors and cytoplasmic proteins that have been shown to abrogate or completely inhibit YY1-mediated activation or repression. For example, it acts as a repressor in absence of adenovirus E1A protein but as an activator in its presence. Acts synergistically with the SMAD1 and SMAD4 in bone morphogenetic protein (BMP)-mediated cardiac-specific gene expression (PubMed:15329343). Binds to SMAD binding elements (SBEs) (5'-GTCT/AGAC-3') within BMP response element (BMPRE) of cardiac activating regions. May play an important role in development and differentiation. Proposed to recruit the PRC2/EED-EZH2 complex to target genes that are transcriptional repressed. Involved in DNA repair. In vitro, binds to DNA recombination intermediate structures (Holliday junctions). Plays a role in regulating enhancer activation (PubMed:28575647). Proposed core component of the chromatin remodeling INO80 complex which is involved in transcriptional regulation, DNA replication and probably DNA repair; proposed to target the INO80 complex to YY1-responsive elements.

ZMYM2\_HUMAN: Zinc finger MYM-type protein 2, May be a component of a BHC histone deacetylase complex that contains HDAC1, HDAC2, HMG20B/BRAF35, KDM1A, RCOR1/CoREST, PHF21A/BHC80, ZMYM2, ZNF217, ZMYM3, GSE1 and GTF2I.

ZMYM4\_HUMAN: The 3'-UTR region of the mRNA encoding this protein contains a motif called CDIR (for cell death inhibiting RNA) that binds HNRPD/AUF1 and HSPB1/HSP27. It is able to inhibit interferon-gamma induced apoptosis.
